# Supplementary material for: One-pot synthesis of luminescent hydrophilic silicon nanocrystals
Source: Royal Society of Chemistry journal article supplement (doi:10.1039/c2ra21044d), 2012-01-01
Supplement: c2ra21044d.pdf [file c2ra21044d.pdf]

## One-pot synthesis of luminescent hydrophilic silicon nanocrystals

Dezhi Tan,<sup>a</sup> Beibei Xu,<sup>a</sup> Ping Chen,<sup>a</sup> Ye Dai,<sup>b</sup> Shifeng Zhou,<sup>a</sup> Guohong Ma<sup>b</sup> and Jianrong Qiu<sup>\*a,c</sup>

<sup>a</sup> State Key Laboratory of Silicon Materials, Zhejiang University Hangzhou, Zhejiang, 310027, P. R. China.

<sup>b</sup> Department of Physics, Shanghai University, Shanghai, 200444, P. R. China.

<sup>c</sup> State Key Laboratory of Luminescence Physics and Chemistry and the Institute of Optical Communication Materials, South China University of Technology, Guangzhou, Guangdong, 510640, P. R. China. Email: qjr@zju.edu.cn.

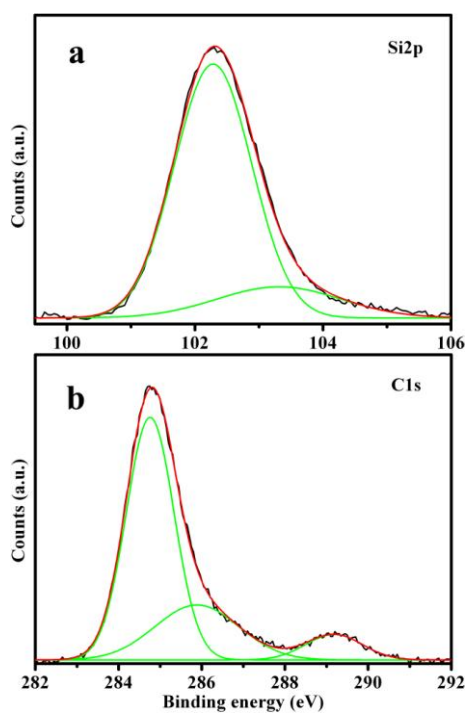

Fig. S1 XPS spectra for Si2p (a) and C1s (b) of hydrophilic SiNCs.
